# Supplementary material for: A nitrogen and sulfur co-doped graphene-supported nickel tetrapyridyloxyphthalocyanine hybrid fabricated by a solvothermal method and its application for the detection of bisphenol A
Source: Royal Society of Chemistry journal article supplement (doi:10.1039/c5ra14516c), 2015-01-01
Supplement: c5ra14516c1.pdf [file c5ra14516c1.pdf]

## Supplementary Information

**Nitrogen and sulfur co-doped graphene-supported nickel tetrapyridyloxyphthalocyanine hybrid fabricated by a solvothermally assisted  $\pi$ - $\pi$  assembly method and its application for the detection of bisphenol A**

**Bo-wen Zhang,<sup>a</sup> Yi-shu Wang,<sup>a</sup> Xv-hong Dai,<sup>a</sup> Da-jun Liu,<sup>a</sup> Xing-quan He<sup>\*a</sup>**

*<sup>a</sup>Department of Chemistry and Chemical Engineering, Changchun University of Science and Technology, Changchun 130022, P. R. China.*

---

\* Corresponding author. Tel.+86-431-85583430

E-mail address:hexingquan@hotmail.com (Xing-Quan He);

## **Experimental details**

For real sample analysis, BPA was extracted from three samples of plastic containers using a method reported by Tu et al. [1]. Briefly, the commercial plastic were cut into small pieces and washed with distilled water. The pieces (4 g) were placed in a 100 mL flask and 50 mL distilled water was added. This was sealed using parafilm, ultrasonicated for 30 minutes and kept overnight at 70 °C for 48 hours. The filtrate was diluted to 100 mL in a volumetric flask. The container samples will be referred to as B1, B2 and B3.

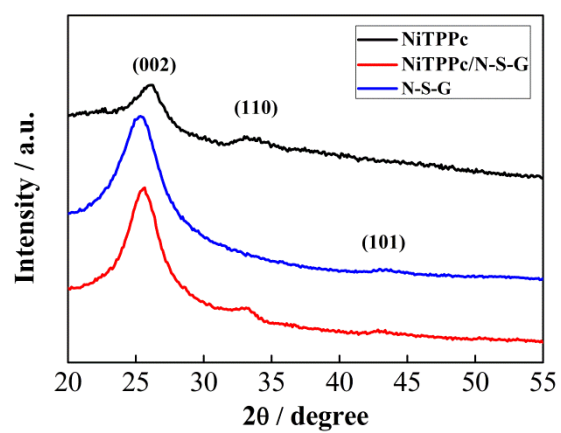

Fig. S1 XRD patterns of NiTPPc (black line), N-S-G (blue line), and NiTPPc/N-S-G (red line).

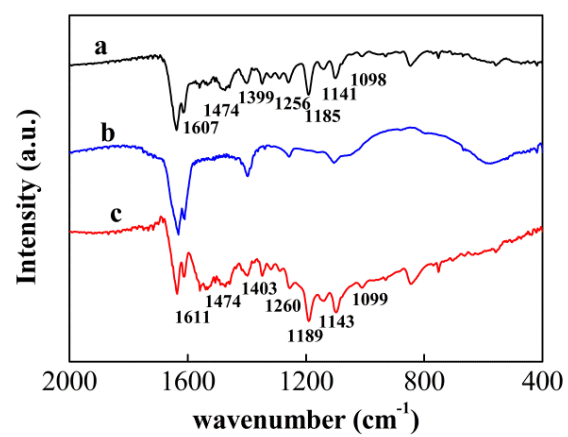

Fig. S2 FT-IR spectra of NiTPPc, N-S-G, and NiTPPc/N-S-G.

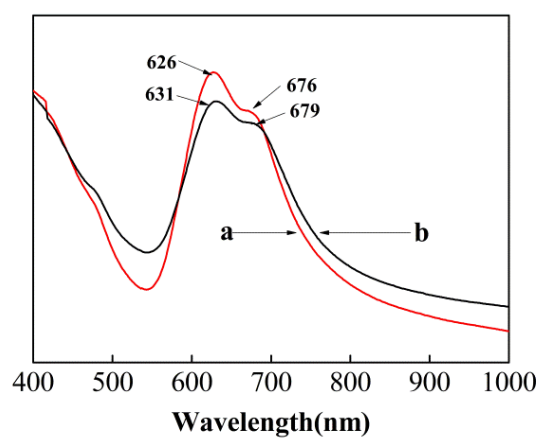

Fig. S3 UV-Vis spectra of NiTPPc in DMF before (a) and after (b) addition of BPA.

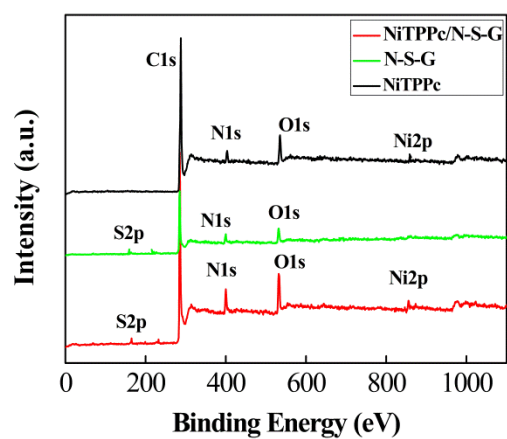

Fig. S4 XPS spectra of NiTPPc, N-S-G, and NiTPPc/N-S-G.

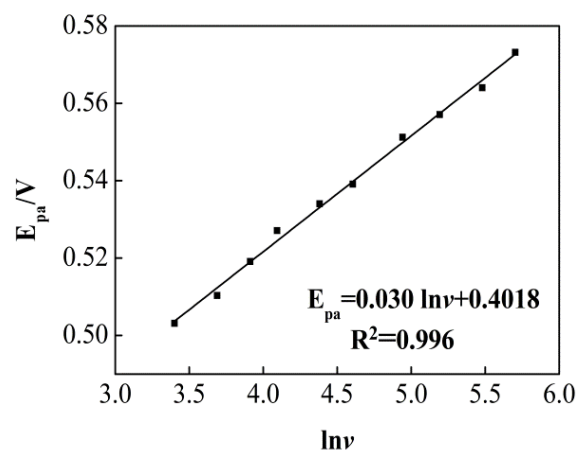

Fig. S5 The relationship between the potential  $E_{pa}$  and the natural logarithm of scan rate ( $\ln v$ ).

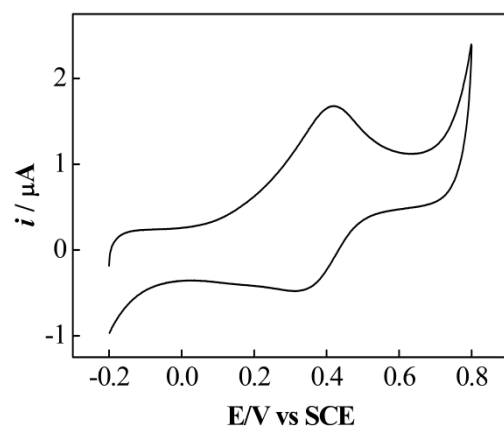

Fig. S6 CVs at NiTPPc modified GCE in 0.2 M phosphate/ethanol buffer solution (pH=7.0).



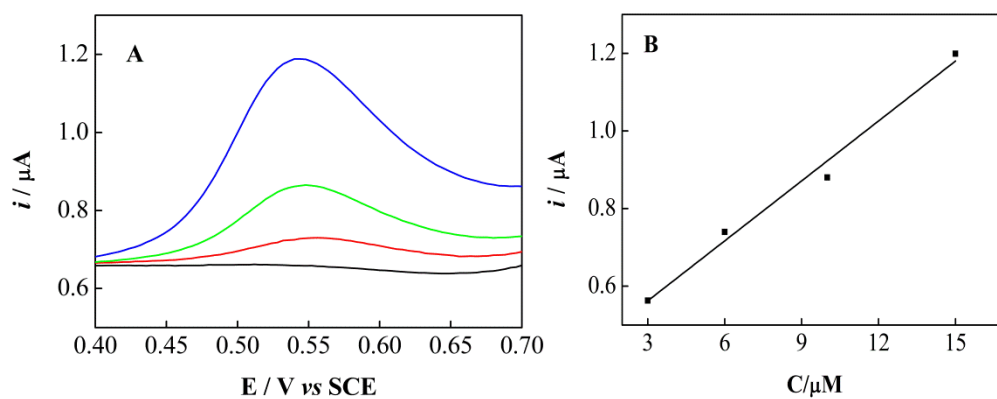

Fig. S7 (A) DPVs of various concentrations of BPA at the NiTPPc modified GCE in pH 7.0 PBS; (B) the relation between the peak currents and the BPA concentrations.

Scan rate:  $50 \text{ mV s}^{-1}$ , pulse amplitude:  $50 \text{ mV}$ , pulse width:  $200 \text{ ms}$ .

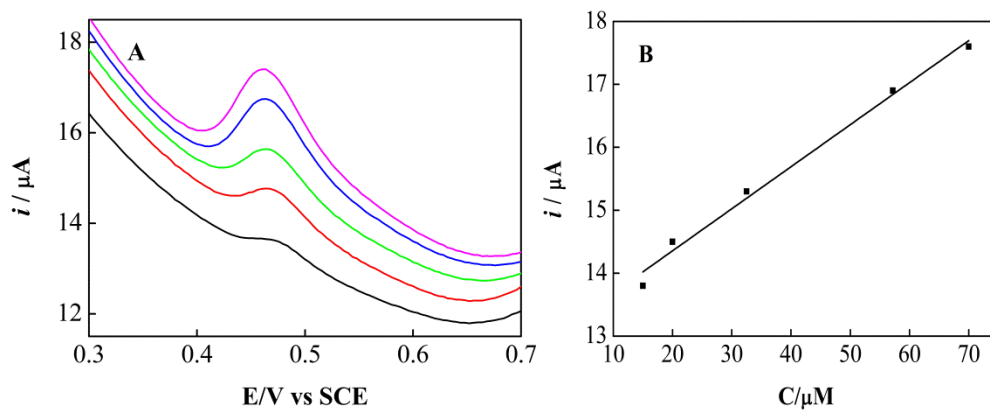

Fig. S8 (A) DPVs of various concentrations of BPA at the N-S-G modified GCE in pH 7.0 PBS; (B) the relation between the peak currents and the BPA concentrations.

Scan rate:  $50 \text{ mV s}^{-1}$ , pulse amplitude:  $50 \text{ mV}$ , pulse width:  $200 \text{ ms}$ .

**Table S1** Comparison of the performance of some modified electrodes used in the electrocatalysis of BPA.

| Type of the electrode | Linear regression equation                                      | Linear range ( $\mu\text{M}$ ) | Detection limit ( $\mu\text{M}$ ) | Sensitivity ( $\mu\text{A}/\text{mM}$ ) |
|-----------------------|-----------------------------------------------------------------|--------------------------------|-----------------------------------|-----------------------------------------|
| NiTPPc                | $i_{pa}$<br>$(\mu\text{A})=0.0515C$<br>$(\mu\text{M})+0.408$    | 3-15                           | 0.3                               | 51.5                                    |
| N-S-G                 | $i_{pa}$<br>$(\mu\text{A})= 0.0668C$<br>$(\mu\text{M}) +13.019$ | 15-70                          | 1.05                              | 66.8                                    |
| NiTPPc/N-S-G          | $i_{pa}$<br>$(\mu\text{A})= 0.089C$<br>$(\mu\text{M}) +5.14$    | 1-122                          | 0.0505                            | 89                                      |

## References

- [1] X. Tu, L. Yan, X. Luo, S. Luo, Q. Xie, *Electroanalysis*, 2009, **21**, 2491–2494.
